# Supplementary material
Source: PubMed Central journal article supplement (PMC5755044)
Supplement: blood786962-suppl1.pdf [file blood786962-suppl1.pdf]

# **LEDGF/p75 is Dispensable for Hematopoiesis but Essential for MLL-rearranged Leukemogenesis**

Sara El Ashkar<sup>1</sup>, Juerg Schwaller<sup>2</sup>, Tim Pieters<sup>3,4</sup>, Steven Goossens<sup>3,4</sup>, Jonas Demeulemeester<sup>1,5</sup>, Frauke Christ<sup>1</sup>, Siska Van Belle<sup>1</sup>, Sabine Juge<sup>2</sup>, Nancy Boeckx<sup>6,7</sup>, Alan Engelman<sup>8</sup>, Pieter Van Vlierberghe<sup>3,4</sup>, Zeger Debyser<sup>1\*</sup> and Jan De Rijck<sup>1\*</sup>

<sup>1</sup>Laboratory for Molecular Virology and Gene Therapy, Department of Pharmaceutical and Pharmacological Sciences, KU Leuven, Leuven, Belgium.

<sup>2</sup>Department of Biomedicine, University Children's Hospital (UKBB), University of Basel, Switzerland.

<sup>3</sup>Center for Medical Genetics, Ghent University, Ghent, Belgium.

<sup>4</sup>Cancer Research Institute Ghent (CRIG), Ghent, Belgium.

<sup>5</sup>Current address: The Francis Crick Institute, London, United Kingdom.

<sup>6</sup>Department of Laboratory Medicine, University Hospitals Leuven, Leuven, Belgium.

<sup>7</sup>Department of Oncology, KU Leuven, Leuven, Belgium

<sup>8</sup>Department of Cancer Immunology and AIDS, Dana-Farber Cancer Institute, Harvard Medical School, Boston, United States of America.

\*Shared senior authorship.

## **Correspondence should be addressed to Jan De Rijck:**

Laboratory for Molecular Virology and Gene Therapy

Kapucijnenvoer 33, VCTB +5

3000 Leuven, Belgium

jan.derijck@kuleuven.be, zeger.debyser@kuleuven.be

Tel.: +32 16 374038, Fax.: +32 16 336336

## Supplemental Methods

### Plasmids

The *pMSCV-HoxA9-pgk-neo* and *MSCV-pgk-neo* vectors were provided by Dr. Guy Sauvageau (Institute for Research in Immunology and Cancer, IRIC, Canada). The pMSCV retroviral vector encoding the *MLL-AF9* or *eGFP* and the lentiviral vector expressing *LEDGF/p75*-miRNA or *eGFP*-miRNA control were previously described<sup>1</sup>. The transfer plasmid for miRNA-based knockdown of *Ledgf/p52* (target sequence 5'-AAGCACCAAACAACATGTAATC-3') was generated based on miRNA-R30 technology<sup>2</sup>. The retroviral vectors *pMSCV-MLL-ENL-Neo* and *pMSCV-Neo* were provided by Dr. Akihiko Yokoyama (Laboratory for Malignancy Control Research, Kyoto University, Japan). To clone point mutations in the MLL-ENL construct, a NotI/MunI fragment from *pMSCV-MLL-ENL-Neo* was subcloned in a pUC backbone. Subsequently a NotI/BspEI fragment was replaced by a synthetic codon optimized sequence with a unique Pfl23II restriction site whereupon the NotI/MunI fragment was shuttled back to *pMSCV-MLL-ENL-Neo*. These mutations were then introduced by replacement of Pfl32II/NotI fragments by synthetic sequences containing the respective mutations.

### Western blot

Cells were washed in phosphate-buffered saline (PBS) and cell pellets were lysed and boiled in 1% SDS. Protein samples were separated by sodium dodecyl sulfate-polyacrylamide gel electrophoresis and electroblotted onto polyvinylidene difluoride membranes (Bio-Rad). Membranes were blocked with milk powder in PBS-0.1% Tween

20 and detection was performed using specific antibodies against LEDGF/p75 (Bethyl, A300-848A) or  $\beta$ -tubulin (Sigma, T4026-2). Horseradish peroxidase (HRP)-conjugated secondary antibodies allowed for chemiluminescence detection (ECL+; Amersham).

### **Bone marrow transplantation**

For reconstitution experiments, donor mice were genotyped for *Cre* expression. Recipient mice (8-10 weeks old) received a lethal irradiation dose of 8 Grays 24 hours prior to tail-vein injection of lin<sup>-</sup> cells ( $1 \times 10^6$  cells per animal). *Psip1* excision was confirmed by qRT-PCR from blood of recipient animals 4 week post-transplantation (data not shown). For leukemogenesis studies *in vivo*, lin<sup>-</sup> cells were transduced with the indicated fusion and similarly transplanted into irradiated recipients.

### **Quantitative RT-PCR**

RNA was isolated using Aurum Total RNA mini kit (Bio-Rad). cDNA was prepared with High Capacity cDNA Reverse Transcription Kit (Thermoscientific). Each reaction contained 12.5 $\mu$ L IQ Supermix (Biorad) or LightCycler® 480 SYBR Green I Master (Roche), 200nM forward and reverse primers and 200nM probe (if indicated) in a final volume of 25 $\mu$ L. Samples were run in triplicates for 10 minutes at 95°C followed by 50 cycles of 10 seconds at 95°C and 30 seconds at 55°C in LightCycler 480 (Roche). Analysis was performed using the LightCycler 480 software supplied by the manufacturer. All primers and probes are listed in Table S1.

### **Chromatin immunoprecipitation**

Lin- cells were freshly extracted from mice (8-10 weeks old) and fixed using 2mM Disuccinimidyl Glutarate for 30 minutes followed by 1% formaldehyde fixation for 10 minutes.  $10^7$  fixed cells were lysed in 120 $\mu$ L lysis buffer (1% SDS, 10mM EDTA, 50mM Tris, pH 8.1) and sonicated using a Bioruptor sonicator (Diagenode) for 40 cycles of 30 seconds with 30 seconds intervals in a water bath at 4°C. Subsequent steps were performed as described<sup>3</sup>. An MLL antibody (Bethyl laboratories, A300-086A) was used to precipitate MLL. qPCR was performed as described above. Primers are listed in Table S1. ChIP-qPCR signals were calculated as a percentage of total input<sup>3</sup>.

### **RNA sequencing analysis**

RNA extraction was performed as described above and 1 $\mu$ g RNA was used as input. Sequencing libraries were prepared using an Illumina TruSeq Stranded mRNA Library Prep Kit according to the manufacturer's instructions. Samples were subsequently 50bp single-end sequenced on an Illumina HiSeq 2500. RNA-Seq reads were mapped to the GRCm38 mouse reference genome assembly using STAR 2.5.1b and read counts per gene (GENCODE release M8/Ensembl 83 gene annotation) were computed<sup>4</sup>. The R/Bioconductor package DESeq2<sup>5</sup> was used for normalization and differential gene expression analysis.

For gene set enrichment analysis, mouse gene IDs were mapped to their human counterparts where possible using Ensembl BioMart. Analysis on the ranked and humanized gene list was performed with GSEA v2.0 using the Molecular Signatures Database C6 oncogenic signatures collection.

HPEAK ChIP-Seq peak calls for MLL1, WDR5 and H3K4me2 from Xu et al., *Cell Discovery*, 2016 were obtained from the NCBI's Gene Expression Omnibus (series GSE68823)<sup>6</sup>. Peaks were annotated and filtered using R/Bioconductor to yield a gene set which had MLL-bound promoters (i.e. an MLL ChIP-Seq peak overlapping a region of 2000bp upstream of the TSS to 200bp downstream of it). A subset of genes with evidence for MLL-complex binding to the promoter was obtained by also requiring overlap with WDR5 and H3K4me2 ChIP-Seq peaks. Both gene sets, as well as those reported for MLL-ENL<sup>7</sup> or MLL-AF9<sup>8</sup> targets were assessed for enrichment in the ranked gene list using GSEA v2.0.

The RNA-Seq data have been deposited in NCBI's Gene Expression Omnibus<sup>6</sup> and are accessible through GEO Series accession number GSE104138 (<https://www.ncbi.nlm.nih.gov/geo/query/acc.cgi?acc=GSE104138>).

## Supplemental Figures

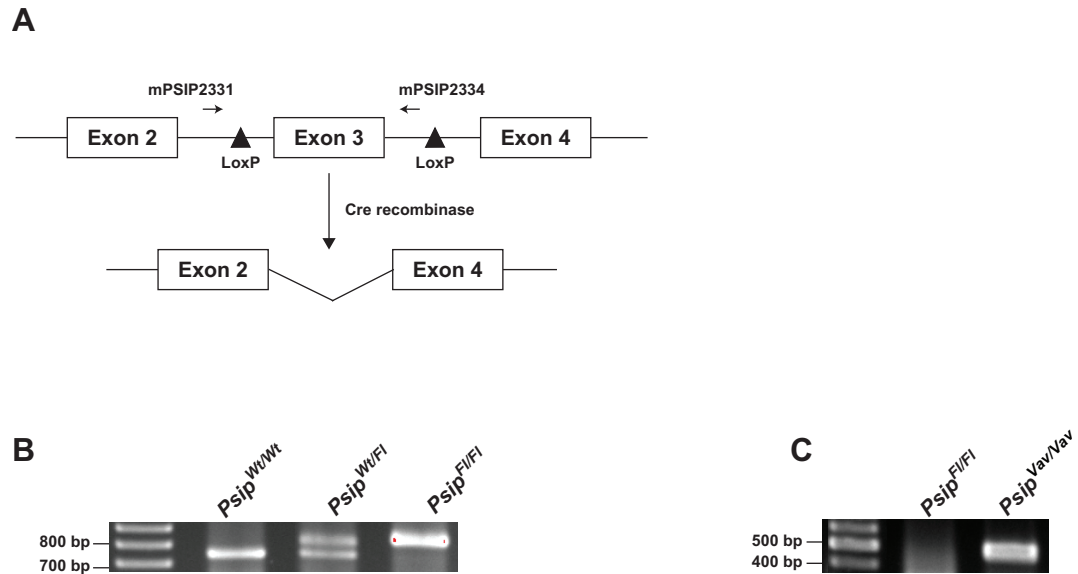

**Figure S1. Generation of *Psip1* knockout mice.**

(A) Schematic representation of the floxed *Psip1* (*Psip<sup>F1/F1</sup>*) gene and the primers used for genotyping. LoxP sites flank exon 3, the second coding exon of *Psip1*, which is deleted after Cre recombination.

(B) Genomic DNA PCR analysis for the genotyping of *Psip<sup>F1/F1</sup>* mice. mPSIP2331 and mPSIP2334 primers amplify 745 bp and 802 bp bands for the wild-type and floxed allele, respectively.

(C) Genomic DNA PCR analysis for the detection of Cre (450 bp) in *Psip<sup>F1/F1</sup>* mice crossed with Vav-iCre mice (referred to as *Psip<sup>F1/F1</sup> Vav-Cre* positive mice or *Psip<sup>Vav/Vav</sup>*).

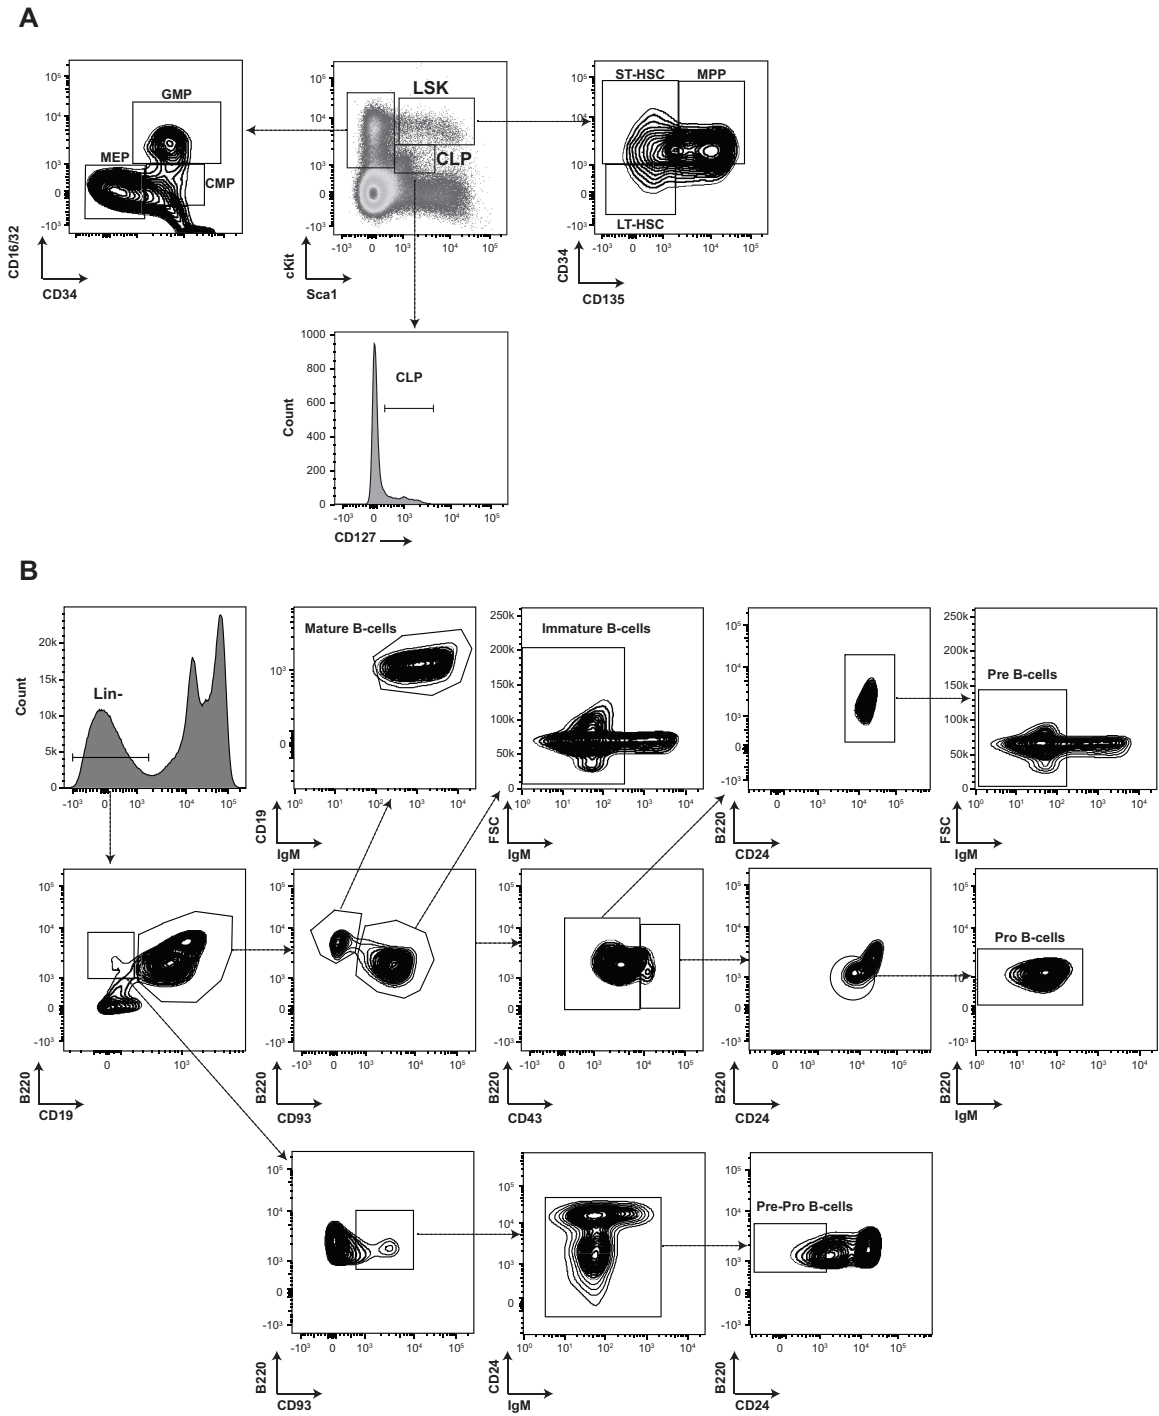

**Figure S2. Gating strategies to identify hematopoietic stem/progenitor cells and B-cell precursor populations**

(A) Exemplary flow cytometric gating strategy to identify hematopoietic stem and progenitor cells. Live bone marrow cells were stained with antibodies against Sca-1, ckit,

CD34, CD16/32 and CD127. Gating strategy for LSK population (Sca-1<sup>+</sup>ckit<sup>+</sup>) showing LT-HSC (CD135<sup>-</sup>CD34<sup>-</sup>), ST-HSC (CD135<sup>-</sup>CD34<sup>+</sup>) and MPP (CD135<sup>+</sup>CD34<sup>+</sup>). More differentiated progenitors gated in the LS<sup>-</sup>K<sup>+</sup> population were sub-sectioned based on CD16/32 and CD34 expression to compare CMP, GMP and MEP progenitors. The CLP fraction, gated on LS<sup>low</sup>K<sup>low</sup>, is further gated on CD127 expression. LSK; Lineage<sup>-</sup>Sca-1<sup>+</sup>ckit<sup>+</sup> population, LT-HSC; long-term hematopoietic stem cells, ST-HSC; short-term hematopoietic stem cells, MPP; multi-potent progenitors, CLP; common lymphoid progenitors, CMP; common myeloid progenitors, MEP; megakaryocyte-erythroid progenitors, GMP; granulocyte-macrophage progenitors.

(B) To determine the frequency of B-cell precursor populations, live bone marrow cells were stained with lineage markers, Sca-1, ckit, CD19, B220, CD93, IgM, CD43, and CD24. Gating strategies for selecting pre-pro-B-cells, pro-B-cells, pre-B -cells, immature B-cells and mature B-cells are shown.



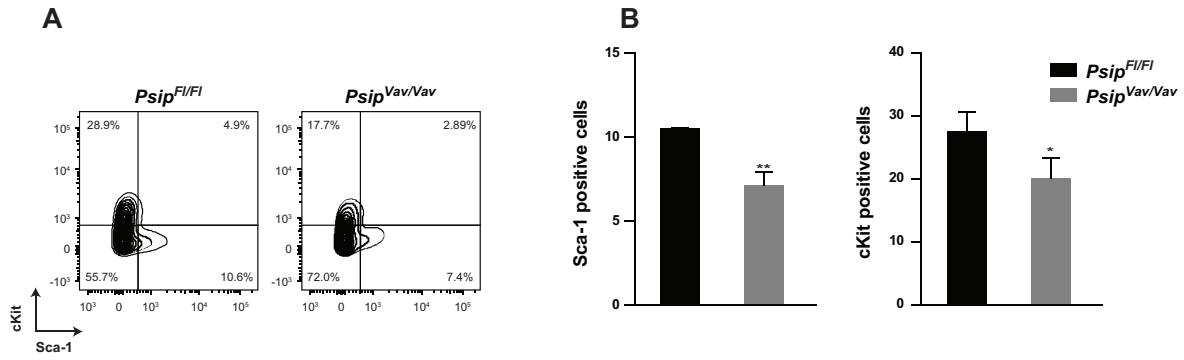

**Figure S3. *Psip1* deletion alters the differentiation of HSC after CFU culture.**

(A) Representative FACS analysis for Sca-1 and cKit expression in *Psip<sup>F1/F1</sup>* and *Psip<sup>Vav/Vav</sup>* cells, harvested after one round in myeloid CFU assay.

(B) Percentage of Sca-1 and cKit positive cells harvested after one round in myeloid CFU assay from 6 independent experiments. Mean values and SEM are indicated.

Significant differences were determined using Student's t-test; \* $p < 0.05$ , \*\* $p < 0.01$ .

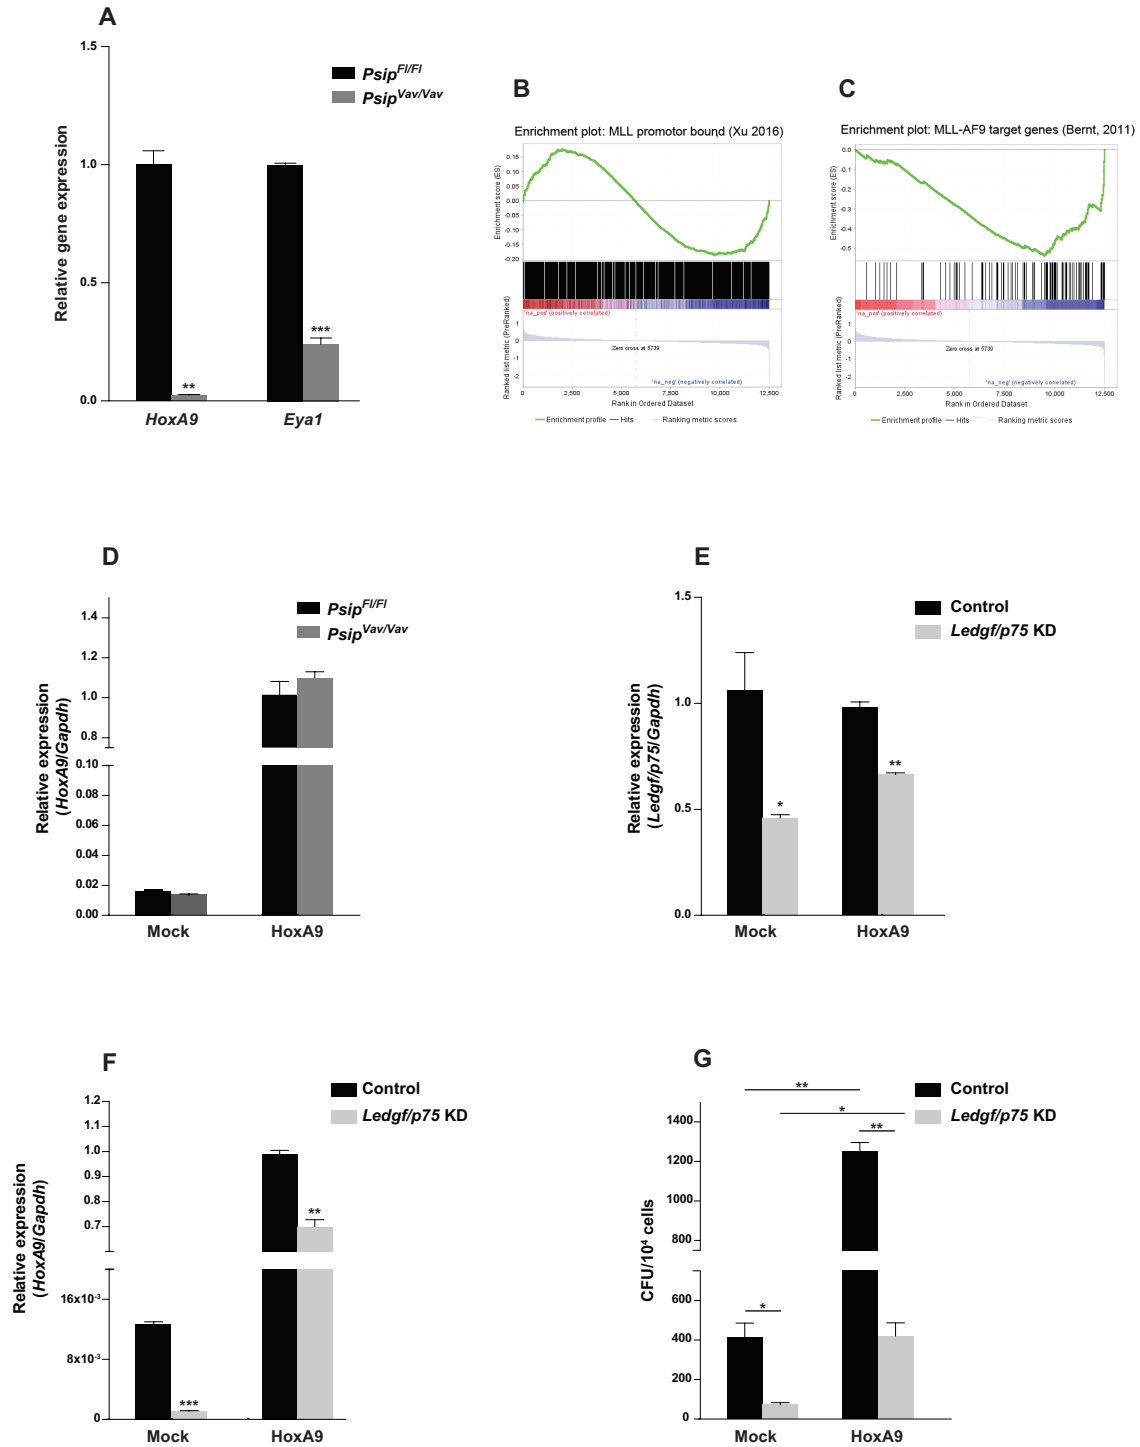

**Figure S4. *HoxA9* overexpression rescues the defective colony formation in LEDGF/p75-deficient cells.**

(A) qRT-PCR validation of known MLL target genes that are downregulated in *Psip*<sup>Vav/Vav</sup> cells. Expression levels were normalized to *Gapdh*.

(B-C) Gene set enrichment analysis (GSEA) showing the correlation between the principle signature of the *Psip*<sup>Vav/Vav</sup> samples and genes with promoter regions bound by wild-type MLL (B) and MLL-AF9 fusion (C).

(D) qRT-PCR measuring *HoxA9* expression levels (normalized to *Gapdh*) in *Psip*<sup>F1/F1</sup> or *Psip*<sup>Vav/Vav</sup> cells after transduction with a retroviral vector expressing *HoxA9* or a mock control.

(E-F) mRNA expression levels of *Ledgf/p75* (E) and *HoxA9* (F) from lin- cells of C57BL/6 mice transduced with lentiviral vector to knockdown (KD) *Ledgf/p75* or control and a retroviral vector expressing *HoxA9* or a mock control. Expression levels are normalized to *Gapdh*.

(G) CFU assay for *Ledgf/p75* knockdown or control cells after transduction with pMSCV-*HoxA9*-pgk-neo or mock vector.

Error bars represent standard deviation of triplicate measurements. Significant differences were determined using Student's t-test; \* $p < 0.05$ , \*\* $p < 0.01$ , \*\*\* $p < 0.001$ .

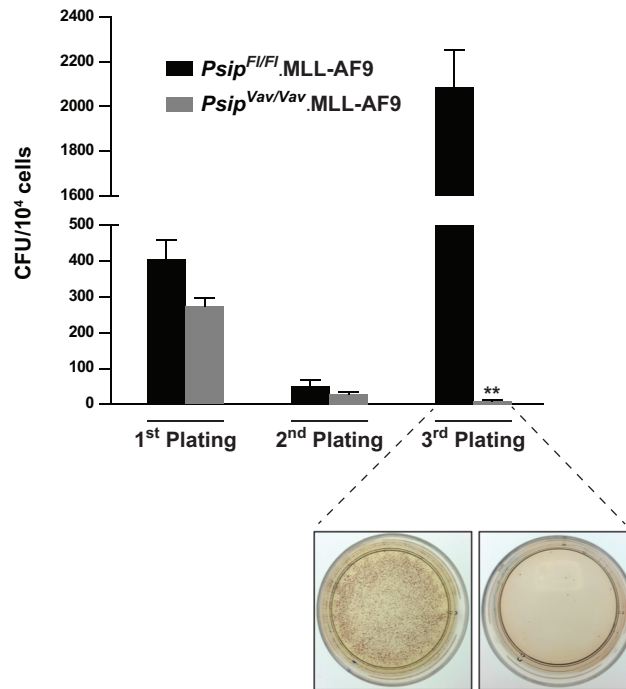

**Figure S5. LEDGF/p75 is important for MLL-rearranged transformation**

Three rounds of colony-forming units (CFU) per  $10^4$  *Psip*<sup>F1/F1</sup> or *Psip*<sup>Vav/Vav</sup> lin- cells transduced with a retroviral vector expressing *MLL-AF9* fusion. Representative images of the Tetrazolium-stained colonies after the third plating are shown. Error bars represent standard deviation of triplicate measurements. Statistical differences (\*\* $p < 0.01$ ) were determined using Student's t-test.

**Table S1. Primers used in this study.**

| <b>Genotyping Primers</b> | <b>Sequence 5'-3'</b>            |
|---------------------------|----------------------------------|
| mPSIP2331                 | GAGATATCGAGGCAGAAAGAAGACTGGGATAG |
| mPSIP2334                 | TGG AAT TCTATCTCAAACAAACCAAAGAGC |
| Vav-Cre_s                 | CTCTGACAGATGCCAGGACA             |
| Vav-Cre_as                | TGATTTTCAGGGATGGACACA            |

| <b>PCR Primers</b> | <b>Sequence 5'-3'</b> |
|--------------------|-----------------------|
| MLL_s              | CGCCTCAGCCACCTACTACA  |
| ENL_as             | CCGGCAGCCTCCTCGCCT    |

| <b>qRT- PCR primers</b> | <b>Sequence 5'-3'</b>       |
|-------------------------|-----------------------------|
| mPSIP2624               | CCTCAAACATGACTCGCGATTTC     |
| mPSIP2625               | GCTCCATCAGGAACTTCATCTAC     |
| mPSIP probe             | AGACCTCATCTTCGCCAAGA        |
| HoxA4_s                 | TGTACCCCTGGATGAAGAAGATC     |
| HoxA4_as                | GCTTAGGTTTCGCTCCGTTA        |
| HoxA7_s                 | TATGTGAACGCGCTTTTTAGCA      |
| HoxA7_as                | GGGGGCTGTTGACATTGTATAA      |
| HoxA9_s                 | GAA TGA GAG CGGCGGAGAC      |
| HoxA9_as                | GAGCGAGCATGTAGCCAGTTG       |
| HoxA10_s                | ACACTGGAGCTGGAGAAGGA        |
| HoxA10_as               | TCACTTGTCTGTCCGTGAGG        |
| HoxA11_s                | TTTGATGAGCGTGGTCCCTG        |
| HoxA11_as               | AGGAGTAGGAGTATGTCATTGGG     |
| HoxB4_s                 | ATCTGTCTTGTTTCCTCTGCCG      |
| HoxB4_as                | TGAATGGGCACGAAAGATGAGG      |
| HoxB8_s                 | TGATTTGTTGTGAGGCAAGAGA      |
| HoxB8_as                | CCATTAGAGACCCCGCATCC        |
| Meis1_s                 | CCTCGGTCAATGACGCTTTAA       |
| Meis1_as                | GGTACAAGTAGCTAATTCACATTTCTC |
| Eya1_s                  | TCTCAGGTTTCAGCTCTCGGA       |
| Eya1_as                 | GGGGTAGGGAGAATATGTGGG       |

|             |                            |
|-------------|----------------------------|
| Gapdh_s     | TGTGTCCGTCGTGGATCTGA       |
| Gapdh_as    | CCTGCTTCACCACCTTCTTGA      |
| Gapdh probe | CCGCCTGGAGAAACCTGCCAAGTATG |

| ChIP Primers     | Sequence 5'-3'          |
|------------------|-------------------------|
| HoxA9_s          | GATACCAGAGCGGTTTCATACAG |
| HoxA9_as         | TCGCCAGTCAACATCAAGAG    |
| HoxA7_s          | TAACCTGTCCGCCCAAAGAT    |
| HoxA7_as         | GCTGGAGCATCAAATCAGGTCT  |
| $\beta$ actin_s  | AGCTTCTTTGCAGCTCCTT     |
| $\beta$ actin_as | TGAGGTACTAGCCACGAGAG    |

**Table S2. FACS staining of hematopoietic progenitors in BM.**

| Laser                 | Channel              | Antibody Target -<br>Fluorochrome | Company     | Dilution    |       |
|-----------------------|----------------------|-----------------------------------|-------------|-------------|-------|
| Blue 488nm<br>100mW   | B-SSC                | SSC                               |             |             |       |
|                       | B-PE-Cy5-5           | B-PE                              | CD135-PE    | eBioscience | 1/100 |
|                       |                      | CD3e-biotin                       | eBioscience | 3/100       |       |
|                       |                      | CD11b-biotin                      | eBioscience | 3/100       |       |
|                       |                      | B220-biotin                       | eBioscience | 3/100       |       |
|                       |                      | Ly-6G-biotin                      | eBioscience | 3/100       |       |
|                       |                      | Ter-119-biotin                    | eBioscience | 3/100       |       |
|                       |                      | Strep-PerCP-Cy5-5                 | eBioscience | 1/100       |       |
| B-PE-Cy7              | Ly-6A (Sca-1)-PE-Cy7 | BD Pharmingen                     | 1/200       |             |       |
| Violet 405nm<br>100mW | V-Pacific Blue       | CD127-eFluor450                   | eBioscience | 1/100       |       |
|                       | V-Amcyan             | L/D-eFluor506                     | eBioscience | 1/200       |       |
| Red 633nm<br>70mW     | R-APC                | CD34-eFluor660                    | eBioscience | 1/200       |       |
|                       | R-AlexaFluor700      | CD16/32-AlexaFluor 700            | eBioscience | 1/200       |       |
|                       | R-APC-Cy7            | CD117 (c-Kit)-eFluor780           | eBioscience | 1/100       |       |

**Table S3. FACS staining of B-cell precursors in BM.**

| <b>Laser</b>               | <b>Channel</b> | <b>Antibody Target-<br/>Fluorochrome</b> | <b>Company</b>   | <b>Dilution</b> |
|----------------------------|----------------|------------------------------------------|------------------|-----------------|
| Blue 488nm<br>50mW         | B-SSC          | SSC                                      |                  |                 |
|                            | B-FITC         | IgM-FITC                                 | BD Pharmingen    | 1/200           |
| Violet 405nm<br>50mW       | V-Pacific Blue | CD24-Pacific Blue                        | eBioscience      | 1/100           |
|                            | V-Amcyan       | L/D-eFluor506                            | eBioscience      | 1/200           |
|                            | V-BV605        | B220-BV605                               | eBioscience      | 1/200           |
| Red 633nm<br>70mW          | R-APC          | CD93-APC                                 | eBioscience      | 1/50            |
|                            | R-APC-Cy7      | CD19-APC-Cy7                             | BD Pharmingen    | 1/200           |
| Yellow-Green<br>561nm 50mW | G-PE-TexasRed  | CD127-PE-CF594                           | BD Pharmingen    | 1/100           |
|                            | G-PE-Cy5       | Ter119-PE-Cy5                            | eBioscience      | 1/200           |
|                            | G-PE-Cy5       | Gr1-PE-Cy5                               | eBioscience      | 1/200           |
|                            | G-PE-Cy5       | CD3-PE-Cy5                               | Tonbo Bioscience | 1/200           |
|                            | G-PE-Cy5       | NK1.1-PE-Cy5                             | Biolegend        | 1/200           |
|                            | G-PE-Cy5       | CD11b-PE-Cy5                             | eBioscience      | 1/200           |
|                            | G-PE-Cy7       | CD43-PE-Cy7                              | Biolegend        | 1/100           |

**Table S4. Differentially regulated genes ( $p < 0.05$ ) between  $Psip^{F1/F1}$  and  $Psip^{Vav/Vav}$  cells.**

| Gene Symbol   | Log2 Fold Change | P value              |
|---------------|------------------|----------------------|
| Ifi202b       | -3.7710          | 4.95E <sup>-15</sup> |
| Ctse          | -3.2932          | 9.19E <sup>-18</sup> |
| Gm9025        | -3.2229          | 1.14E <sup>-14</sup> |
| Hoxa9         | -2.5245          | 1.88E <sup>-07</sup> |
| Ceacam2       | -2.0396          | 1.55E <sup>-05</sup> |
| Psip1         | -2.0350          | 5.85E <sup>-11</sup> |
| Cldn11        | -2.0334          | 5.72E <sup>-06</sup> |
| Rps24-ps3     | -2.0240          | 2.95E <sup>-05</sup> |
| Gm8822        | -1.8563          | 1.24E <sup>-04</sup> |
| Psmas8        | -1.5806          | 9.68E <sup>-04</sup> |
| Ptk7          | -1.5397          | 7.71E <sup>-05</sup> |
| Eya1          | -1.5321          | 1.58E <sup>-03</sup> |
| Mcpt1         | -1.4934          | 1.66E <sup>-03</sup> |
| C1qa          | -1.4531          | 1.98E <sup>-03</sup> |
| Rpsa-ps10     | -1.4530          | 2.75E <sup>-04</sup> |
| Mcpt2         | -1.4349          | 1.72E <sup>-03</sup> |
| Mcpt4         | -1.4272          | 2.10E <sup>-03</sup> |
| St8sia1       | -1.3811          | 3.71E <sup>-03</sup> |
| Capn11        | -1.3765          | 4.02E <sup>-03</sup> |
| Gm13736       | -1.3746          | 2.08E <sup>-03</sup> |
| F13a1         | -1.2618          | 8.57E <sup>-04</sup> |
| 1700006J14Rik | -1.1880          | 1.40E <sup>-02</sup> |
| Itln1         | -1.1778          | 1.30E <sup>-03</sup> |
| Six1          | -1.0811          | 1.34E <sup>-02</sup> |
| Slc26a9       | -1.0663          | 2.50E <sup>-02</sup> |
| Hnmt          | -1.0599          | 5.35E <sup>-03</sup> |
| Gm16754       | -1.0422          | 3.14E <sup>-02</sup> |
| Gm1840        | -1.0374          | 2.85E <sup>-02</sup> |
| Kcnip3        | -1.0372          | 1.88E <sup>-02</sup> |
| Adgrl4        | -0.9742          | 2.06E <sup>-02</sup> |
| Hoxa7         | -0.9732          | 2.42E <sup>-02</sup> |
| Rgs13         | -0.9726          | 2.83E <sup>-02</sup> |
| Gjb3          | -0.9679          | 4.39E <sup>-02</sup> |
| Msl3l2        | -0.9279          | 4.87E <sup>-02</sup> |
| Mef2c         | -0.8897          | 6.67E <sup>-03</sup> |

| Gene Symbol   | Log2 Fold Change | P value              |
|---------------|------------------|----------------------|
| Msantd3       | -0.8773          | 3.49E <sup>-02</sup> |
| Ifi47         | -0.8488          | 2.90E <sup>-02</sup> |
| Selenbp1      | -0.8361          | 3.55E <sup>-02</sup> |
| Ankrd37       | -0.8252          | 2.45E <sup>-02</sup> |
| Egln3         | -0.8076          | 2.71E <sup>-02</sup> |
| Cox4i2        | -0.7628          | 4.32E <sup>-02</sup> |
| 2810417H13Rik | -0.7280          | 2.16E <sup>-02</sup> |
| Nphs2         | -0.6443          | 2.60E <sup>-02</sup> |
| Gpr65         | -0.6080          | 4.83E <sup>-02</sup> |
| Lmna          | 0.5855           | 3.42E <sup>-02</sup> |
| Slc6a4        | 0.5978           | 3.54E <sup>-02</sup> |
| Lztf11        | 0.6342           | 4.21E <sup>-02</sup> |
| Commd10       | 0.6506           | 2.23E <sup>-02</sup> |
| Rpl21-ps9     | 0.7047           | 4.24E <sup>-02</sup> |
| Ptprs         | 0.7476           | 8.66E <sup>-03</sup> |
| Rxra          | 0.7481           | 2.24E <sup>-02</sup> |
| BC100530      | 0.7605           | 4.29E <sup>-02</sup> |
| Ighg2c        | 0.7643           | 2.20E <sup>-02</sup> |
| Tmtc2         | 0.7682           | 3.78E <sup>-02</sup> |
| Inpp11        | 0.7774           | 4.17E <sup>-02</sup> |
| Bahcc1        | 0.7791           | 3.19E <sup>-02</sup> |
| Slc39a2       | 0.7821           | 3.96E <sup>-02</sup> |
| 4931429I11Rik | 0.7979           | 4.58E <sup>-02</sup> |
| Stfa3         | 0.8061           | 2.30E <sup>-02</sup> |
| Spats2        | 0.8179           | 3.75E <sup>-02</sup> |
| Zfp182        | 0.8298           | 4.92E <sup>-02</sup> |
| Kctd15        | 0.8317           | 4.39E <sup>-02</sup> |
| Gfra1         | 0.8384           | 4.94E <sup>-02</sup> |
| 4931408C20Rik | 0.8390           | 2.90E <sup>-02</sup> |
| Col27a1       | 0.8514           | 5.04E <sup>-02</sup> |
| Dok7          | 0.8550           | 1.31E <sup>-02</sup> |
| BC117090      | 0.8584           | 4.21E <sup>-02</sup> |
| Gabbr1        | 0.8641           | 3.89E <sup>-02</sup> |
| Gm10440       | 0.8650           | 1.67E <sup>-02</sup> |
| Gm4076        | 0.8684           | 3.91E <sup>-02</sup> |



|               |        |                      |               |        |                      |
|---------------|--------|----------------------|---------------|--------|----------------------|
| Fam213a       | 0.8686 | 3.66E <sup>-02</sup> | Rnf225        | 0.9810 | 4.13E <sup>-02</sup> |
| Lama5         | 0.8764 | 4.71E <sup>-02</sup> | Ephx1         | 0.9817 | 1.48E <sup>-02</sup> |
| Tmem98        | 0.8795 | 3.16E <sup>-02</sup> | Col23a1       | 0.9853 | 2.86E <sup>-03</sup> |
| Camkk1        | 0.8824 | 3.91E <sup>-02</sup> | Clefl         | 0.9855 | 2.69E <sup>-02</sup> |
| Gm5416        | 0.8837 | 1.31E <sup>-02</sup> | Epha2         | 0.9856 | 3.95E <sup>-02</sup> |
| Gprc5b        | 0.8868 | 4.51E <sup>-02</sup> | Ffar4         | 0.9858 | 2.15E <sup>-02</sup> |
| Mapre3        | 0.8933 | 4.46E <sup>-02</sup> | Kcnc3         | 0.9895 | 1.94E <sup>-02</sup> |
| Ckb           | 0.8957 | 4.34E <sup>-02</sup> | Crtam         | 0.9922 | 3.43E <sup>-02</sup> |
| Gem           | 0.8980 | 5.04E <sup>-02</sup> | Cacna1a       | 0.9949 | 2.77E <sup>-02</sup> |
| Igha          | 0.9001 | 2.74E <sup>-02</sup> | Fzd1          | 1.0020 | 1.92E <sup>-02</sup> |
| Adgrb2        | 0.9019 | 1.74E <sup>-02</sup> | Wwtr1         | 1.0028 | 3.58E <sup>-02</sup> |
| Rpp25         | 0.9067 | 4.55E <sup>-02</sup> | Rap1gap       | 1.0030 | 2.49E <sup>-02</sup> |
| Kenn3         | 0.9109 | 3.38E <sup>-02</sup> | Ptk2          | 1.0043 | 7.43E <sup>-03</sup> |
| Nipal4        | 0.9123 | 4.05E <sup>-02</sup> | Gm11410       | 1.0065 | 1.86E <sup>-02</sup> |
| Gm15663       | 0.9124 | 4.73E <sup>-02</sup> | Sh2d1b1       | 1.0072 | 1.17E <sup>-03</sup> |
| Tmem82        | 0.9143 | 1.52E <sup>-02</sup> | Slc9a5        | 1.0164 | 1.40E <sup>-02</sup> |
| Igf1          | 0.9165 | 1.42E <sup>-02</sup> | Slamf9        | 1.0226 | 1.10E <sup>-02</sup> |
| Akr1b8        | 0.9180 | 2.57E <sup>-02</sup> | Cacnb3        | 1.0249 | 3.39E <sup>-02</sup> |
| Ifi2712a      | 0.9207 | 4.33E <sup>-02</sup> | Gm37145       | 1.0253 | 2.08E <sup>-02</sup> |
| Serpnb6b      | 0.9225 | 4.21E <sup>-02</sup> | 4930486L24Rik | 1.0268 | 2.38E <sup>-02</sup> |
| Fam83h        | 0.9229 | 2.43E <sup>-02</sup> | Mmp25         | 1.0273 | 2.08E <sup>-02</sup> |
| Fbxw10        | 0.9250 | 4.76E <sup>-02</sup> | Cdkn2a        | 1.0284 | 2.22E <sup>-02</sup> |
| 5830415G21Rik | 0.9264 | 2.19E <sup>-02</sup> | Ugt8a         | 1.0299 | 3.30E <sup>-02</sup> |
| Tdrkh         | 0.9302 | 2.41E <sup>-02</sup> | Rhbdf1        | 1.0319 | 2.71E <sup>-02</sup> |
| Fam209        | 0.9328 | 4.52E <sup>-02</sup> | Trp53i11      | 1.0341 | 3.20E <sup>-02</sup> |
| Mn1           | 0.9423 | 3.75E <sup>-02</sup> | 2900041M22Rik | 1.0345 | 3.20E <sup>-02</sup> |
| Ccbe1         | 0.9443 | 2.59E <sup>-02</sup> | Tmem181c-ps   | 1.0351 | 3.07E <sup>-02</sup> |
| Mfsd7c        | 0.9453 | 4.92E <sup>-02</sup> | Npy           | 1.0437 | 7.63E <sup>-03</sup> |
| Pald1         | 0.9478 | 9.09E <sup>-04</sup> | Dcbld1        | 1.0444 | 2.55E <sup>-02</sup> |
| Pkp2          | 0.9483 | 8.90E <sup>-03</sup> | Adgrb1        | 1.0483 | 2.72E <sup>-02</sup> |
| Asb4          | 0.9520 | 3.88E <sup>-02</sup> | Dnah6         | 1.0492 | 2.96E <sup>-02</sup> |
| Tcf7l2        | 0.9562 | 2.24E <sup>-02</sup> | Ctsk          | 1.0508 | 1.26E <sup>-03</sup> |
| Trnp1         | 0.9576 | 4.69E <sup>-02</sup> | Sfmbt2        | 1.0540 | 2.92E <sup>-02</sup> |
| Myrf          | 0.9608 | 1.32E <sup>-02</sup> | Spred3        | 1.0614 | 1.54E <sup>-02</sup> |
| Slc9a2        | 0.9608 | 3.01E <sup>-02</sup> | Mrgpra4       | 1.0653 | 2.74E <sup>-02</sup> |
| Fat3          | 0.9614 | 4.36E <sup>-02</sup> | E230016M11Rik | 1.0708 | 1.85E <sup>-02</sup> |
| Serpina3f     | 0.9670 | 4.54E <sup>-02</sup> | Unc13b        | 1.0774 | 9.44E <sup>-03</sup> |
| Snord19       | 0.9670 | 4.43E <sup>-02</sup> | Trim29        | 1.0855 | 2.08E <sup>-02</sup> |
| Ccdc40        | 0.9684 | 3.23E <sup>-02</sup> | Lyplal1       | 1.0866 | 2.06E <sup>-02</sup> |
| Khdrbs3       | 0.9723 | 4.09E <sup>-02</sup> | 1700030C10Rik | 1.0891 | 1.34E <sup>-02</sup> |

|               |        |                      |
|---------------|--------|----------------------|
| Myo15b        | 0.9744 | 3.03E <sup>-02</sup> |
| Rpgrip1       | 1.0990 | 1.68E <sup>-02</sup> |
| Klk8          | 1.1023 | 1.83E <sup>-02</sup> |
| Plet1         | 1.1039 | 1.61E <sup>-02</sup> |
| Amigo2        | 1.1051 | 1.21E <sup>-02</sup> |
| Ptpn          | 1.1091 | 1.98E <sup>-02</sup> |
| Fabp7         | 1.1100 | 2.12E <sup>-02</sup> |
| Cfap45        | 1.1169 | 9.52E <sup>-03</sup> |
| Map1a         | 1.1179 | 2.02E <sup>-02</sup> |
| Meg3          | 1.1203 | 1.09E <sup>-02</sup> |
| Ush1c         | 1.1266 | 1.87E <sup>-02</sup> |
| Mrgprc2-ps    | 1.1313 | 1.36E <sup>-02</sup> |
| Tgfa          | 1.1336 | 1.05E <sup>-02</sup> |
| Bcam          | 1.1352 | 1.01E <sup>-02</sup> |
| Gm12648       | 1.1408 | 1.62E <sup>-02</sup> |
| Dsc2          | 1.1420 | 1.16E <sup>-02</sup> |
| Wtip          | 1.1440 | 1.74E <sup>-02</sup> |
| Neol          | 1.1480 | 1.05E <sup>-02</sup> |
| Slc12a5       | 1.1483 | 1.42E <sup>-02</sup> |
| Cftr          | 1.1487 | 1.69E <sup>-02</sup> |
| Fgf7          | 1.1502 | 1.38E <sup>-02</sup> |
| Chd5          | 1.1588 | 7.74E <sup>-03</sup> |
| Gm23301       | 1.1618 | 1.38E <sup>-02</sup> |
| Slc29a4       | 1.1665 | 1.22E <sup>-02</sup> |
| Deaf1211      | 1.1708 | 6.15E <sup>-03</sup> |
| Gm37068       | 1.1711 | 2.46E <sup>-03</sup> |
| Naip5         | 1.1737 | 1.05E <sup>-02</sup> |
| Gm13453       | 1.1857 | 1.38E <sup>-02</sup> |
| Scarf2        | 1.2222 | 7.48E <sup>-03</sup> |
| Zfp462        | 1.2322 | 7.05E <sup>-03</sup> |
| B930095G15Rik | 1.2451 | 2.15E <sup>-03</sup> |
| Mal2          | 1.2485 | 7.34E <sup>-03</sup> |

|               |        |                       |
|---------------|--------|-----------------------|
| Rundc3a       | 1.0919 | 1.19E <sup>-02</sup>  |
| Rbms3         | 1.4104 | 3.43E <sup>-03</sup>  |
| Marco         | 1.2570 | 1.68E <sup>-03</sup>  |
| Pls3          | 1.2650 | 1.30E <sup>-03</sup>  |
| Shank1        | 1.2973 | 7.30E <sup>-03</sup>  |
| Vangl1        | 1.3004 | 6.77E <sup>-03</sup>  |
| 3830403N18Rik | 1.3122 | 5.23E <sup>-03</sup>  |
| Adra2c        | 1.3383 | 4.86E <sup>-03</sup>  |
| Arnt2         | 1.3393 | 2.18E <sup>-04</sup>  |
| Mest          | 1.3740 | 3.79E <sup>-03</sup>  |
| Peg12         | 1.3855 | 1.62E <sup>-04</sup>  |
| Zfp467        | 1.3894 | 2.77E <sup>-03</sup>  |
| Phf21b        | 1.4758 | 1.63E <sup>-03</sup>  |
| Meis3         | 1.5136 | 2.57E <sup>-04</sup>  |
| Kif21a        | 1.5277 | 2.08E <sup>-04</sup>  |
| Ric3          | 1.5407 | 1.31E <sup>-03</sup>  |
| H2afy2        | 1.5483 | 1.14E <sup>-03</sup>  |
| Astn2         | 1.5594 | 1.24E <sup>-03</sup>  |
| Fgfr1         | 1.5867 | 7.47E <sup>-05</sup>  |
| Ccnd1         | 1.5969 | 1.07E <sup>-06</sup>  |
| Arhgef26      | 1.6595 | 3.14E <sup>-04</sup>  |
| Prickle2      | 1.7605 | 6.12E <sup>-05</sup>  |
| Gm10093       | 1.7646 | 2.35E <sup>-04</sup>  |
| Sva           | 2.0288 | 5.74E <sup>-06</sup>  |
| Xkr6          | 2.0625 | 7.37E <sup>-07</sup>  |
| Peg3          | 2.0971 | 5.29E <sup>-06</sup>  |
| Fzd8          | 2.1279 | 8.67E <sup>-06</sup>  |
| Uchl1         | 2.2424 | 9.70E <sup>-07</sup>  |
| Adamts1       | 2.2802 | 2.37E <sup>-07</sup>  |
| Ndn           | 2.3723 | 4.30E <sup>-07</sup>  |
| Elavl2        | 2.4723 | 2.75E <sup>-07</sup>  |
| Abcc8         | 2.8601 | 8.00E <sup>-011</sup> |

## References

1. Méreau H, De Rijck J, Čermáková K, et al. Impairing MLL-fusion gene-mediated transformation by dissecting critical interactions with the lens epithelium-derived growth factor (LEDGF/p75). *Leukemia*. 2013;27(6):1245–1253.
2. Sun D, Melegari M, Sridhar S, Rogler C, Zhu L. Multi-miRNA hairpin method that improves gene knockdown efficiency and provides linked multi-gene knockdown. *BioTechniques*. 2006;41(1):59–63.
3. Milne TA, Zhao K, Hess JL. Chromatin immunoprecipitation (ChIP) for analysis of histone modifications and chromatin-associated proteins. *Methods Mol. Biol.* 2009;538(Chapter 21):409–423.
4. Dobin A, Davis CA, Schlesinger F, et al. STAR: ultrafast universal RNA-seq aligner. *Bioinformatics*. 2013;29(1):15–21.
5. Love MI, Huber W, Anders S. Moderated estimation of fold change and dispersion for RNA-seq data with DESeq2. *Genome Biology*. 2014;15(12):550.
6. Edgar R, Domrachev M, Lash AE. Gene Expression Omnibus: NCBI gene expression and hybridization array data repository. *Nucleic Acids Research*. 2002;30(1):207–210.
7. Wang Q-F, Wu G, Mi S, et al. MLL fusion proteins preferentially regulate a subset of wild-type MLL target genes in the leukemic genome. *Blood*. 2011;117(25):6895–6905.
8. Bernt KM, Zhu N, Sinha AU, Vempati S, Faber J. MLL-rearranged leukemia is dependent on aberrant H3K79 methylation by DOT1L. *Cancer Cell*. 2011.
